# Supplementary material for: Enantioselective sulfoxidation using Streptomyces glaucescens GLA.0
Source: Royal Society of Chemistry journal article supplement (doi:10.1039/d0ra05838f), 2020-01-01
Supplement: d0ra05838f1.pdf [file d0ra05838f1.pdf]

*Supplementary Information*

## Enantioselective sulfoxidation using *Streptomyces glaucescens* GLA.0

Sara Salama<sup>1</sup>, Tarek Dishisha<sup>2</sup>, Mohamed H. Habib<sup>3</sup>, Ahmed Z. Abdelazem<sup>1</sup>, Walid Bakeer<sup>2</sup>,  
Mahmoud Abdel-Latif<sup>4</sup>, and Yasser Gaber<sup>2,5\*</sup>

<sup>1</sup>Biotechnology and Life Sciences Department, Faculty of Postgraduate Studies for Advanced Sciences, Beni-Suef University, Beni-Suef, 62517, Egypt

<sup>2</sup>Department of Pharmaceutical Microbiology and Immunology, Faculty of Pharmacy, Beni-Suef University, Beni-Suef, 62511, Egypt

<sup>3</sup>Department of Microbiology and Immunology, Faculty of Pharmacy, Cairo University, Cairo, 11562, Egypt

<sup>4</sup>Immunity Division, Zoology Department, Faculty of Science, Beni-Suef University, Beni-Suef, 62511, Egypt.

<sup>5</sup>Department of Pharmaceutics and Pharmaceutical Technology, College of Pharmacy, Mutah University, Al-Karak, 61710, Jordan

**\*Corresponding author:**

E-mail:

Tel.

Telefax.

|                     | ORCID               | Email                           |
|---------------------|---------------------|---------------------------------|
| Sara Salama         | 0000-0002-8722-8627 | sarasalama@psas.edu.eg          |
| Tarek Dishisha      | 0000-0001-8644-2640 | tarek.dishisha@pharm.bsu.edu.eg |
| Mohamed H. Habib    | 0000-0002-3732-5963 | mohamed.habib@pharma.cu.edu.eg  |
| Ahmed Z. Abdelazem  | 0000-0002-2417-6073 | aznagi@psas.bsu.edu.eg          |
| Walid Bakeer        | 0000-0002-6079-8072 | walid.bakeer@yahoo.com          |
| Mahmoud Abdel-Latif | 0000-0001-5060-0475 | mahmoudsayed@science.bsu.edu.eg |
| Yasser Gaber        | 0000-0003-2244-4406 | yasser.gaber@pharm.bsu.edu.eg   |



## Table of Contents

|                                                                                                                                                                                                      |    |
|------------------------------------------------------------------------------------------------------------------------------------------------------------------------------------------------------|----|
| <b>Fig. S1.</b> Multiple sequence alignment of a putative BVMO enzyme in the genome of <i>Streptomyces glaucescens</i> GLA.0.....                                                                    | 3  |
| <b>Fig. S2.</b> Homology model of the putative BVMO identified in the genome of <i>S. glaucescens</i> GLA.0. ....                                                                                    | 4  |
| <b>Fig. S3.</b> Zoom-in view of the active site of the putative BVMO in <i>S. glaucescens</i> GLA.0. ....                                                                                            | 5  |
| <b>Fig. S4.</b> GC chromatogram of phenyl methyl sulfide at the beginning of the reaction. ....                                                                                                      | 6  |
| <b>Fig. S5.</b> GC chromatogram of phenyl methyl sulfide after a substrate control reaction.....                                                                                                     | 7  |
| <b>Fig. S6.</b> Full scan GC chromatogram of phenyl methyl sulfide showing the effect of agitation on the biotransformation process. ....                                                            | 8  |
| <b>Fig. S7.</b> IR spectrum of the chemically synthesized phenyl methyl sulfoxide. ....                                                                                                              | 9  |
| <b>Fig. S8.</b> IR spectrum of the chemically synthesized phenyl methyl sulfone. ....                                                                                                                | 10 |
| <b>Fig. S9.</b> GC chromatogram showing the formation of phenyl methyl sulfoxide after 15 h.....                                                                                                     | 11 |
| <b>Fig. S10.</b> GC chromatogram showing the formation of phenyl methyl sulfoxide after 6 h .....                                                                                                    | 12 |
| <b>Fig. S11.</b> The effect of cosolvent addition on the product (PMSO) and by-product (sulfone).....                                                                                                | 13 |
| <b>Fig. S11.A.</b> GC chromatograms showing products formed under conditions of reaction A. ....                                                                                                     | 13 |
| <b>Fig. S11.B.</b> GC chromatogram showing products formed under conditions of reaction B. ....                                                                                                      | 14 |
| <b>Fig. S14.</b> Chiral GC chromatograms showing oxidized products formed from PMS biooxidation with the whole cells of <i>Streptomyces glaucescens</i> GLA.0 under conditions of reaction (I).....  | 17 |
| <b>Fig. S16.</b> Chiral GC chromatograms showing oxidized products formed from PMS biooxidation with the whole cells of <i>Streptomyces glaucescens</i> GLA.0 under conditions of reaction (K). .... | 19 |
| <b>Fig. S17.</b> Chiral GC chromatogram showing <i>R</i> -PMSO produced from enzymatic oxidation of PMS using phenyl acetone monooxygenase (PAMO).....                                               | 20 |
| <b>Fig. S18.</b> Chiral GC chromatogram showing <i>R</i> -PMSO produced from the enzymatic oxidation of PMS using cyclohexanone monooxygenase (CHMO).....                                            | 21 |
| <b>Fig. S19.</b> Chiral GC chromatogram showing standard phenyl methyl sulfone.....                                                                                                                  | 22 |
| <b>Table S1.</b> Preliminary biotransformation experiments of PMS biooxidation using <i>S. glaucescens</i> GLA.0 and their effects on PMS biotransformation. ....                                    | 23 |
| <b>Table S2.</b> Optimization of the biotransformation experiments with whole growing cells of <i>S. glaucescens</i> GLA.0.....                                                                      | 24 |

| Annotation                                             | A0A089YZ45_STRGA | 1   | -----MAEHEHVRVAVIGSGFGGLGAAVRLRREGVTFDFVVLERADS                     | 41  |
|--------------------------------------------------------|------------------|-----|---------------------------------------------------------------------|-----|
| <input checked="" type="checkbox"/> Nucleotide binding | BVMO2_STRCO      | 1   | -----MAEHEQVHEHVRVAVIGSGFGGLGAAVRLRREGITDFVVLERAGS                  | 45  |
| <input type="checkbox"/> Chain                         | BVMO_PSEAE       | 1   | MYTFANNHNRSLAMSTQPTPAARHCKVAIIGTGFSLGMAIRLRQEGEDDFLIFEKDG           | 60  |
| <input type="checkbox"/> Transmembrane                 | B8N653_ASPFN     | 1   | -----MNGTQASNGVLHLDALIIGSGFSGIYLLHKLRLDELKLVKVFEEESD                | 47  |
| <input type="checkbox"/> Region                        | A0A089YZ45_STRGA | 42  | VGGTWRDINSYPGCACDVPVSHLYSFSFAP---NPDWPRAFSGQEHIRAYLERVADVFGLRP      | 98  |
| <input checked="" type="checkbox"/> Site               | BVMO2_STRCO      | 46  | VGGTWRDINSYPGCACVPSHLYSFSFAP---NPEWPRTFSGQEHIRAYLEHVADTFGLRP        | 102 |
| <input checked="" type="checkbox"/> Binding site       | BVMO_PSEAE       | 61  | VGGTWRVNNYPGCACVQVSHVYSFSFEA---NPEWTRMFARQFEIRAYLEKWEKYLRLQE        | 117 |
|                                                        | B8N653_ASPFN     | 48  | IGGTWNNNRYPGARVDCFPVPHYAYSLPEVWQSWNTELYPNQKEIKSYFDHVRDRLDVRK        | 107 |
|                                                        |                  |     | :****. * ***. * .*:*: . : * : * * : : : : : : : : : :               |     |
|                                                        | A0A089YZ45_STRGA | 99  | HLRFGEVVKLMTWDPHELRWDIETGSSGR-LTADLVVSATGPLSDPKIPDIPGLDTFFPGKV      | 157 |
|                                                        | BVMO2_STRCO      | 103 | HLRFDSEVKRMAWDTEQLRWEIETVGRGT-LTADVVVSATGPLSDPKVPDIPGLDTFFPGKV      | 161 |
|                                                        | BVMO_PSEAE       | 118 | KTLLENTEIGKLAWDERQSLWHLHDAQGNHYTANAVVSGMGGLSTPAYPRLDGLENFQGV        | 177 |
|                                                        | B8N653_ASPFN     | 108 | DCLFHSRVNEGTFDEATGRVVTWTDGKVATAKYLLVAVGFASKSLPDKWGLDSFKGTI          | 167 |
|                                                        |                  |     | . : : : . : : : : : * : * : * : : : * : : : : * : * : : * : * : : : |     |
|                                                        | A0A089YZ45_STRGA | 158 | FHSARWDHD--YDLKGRVAVMVGTSASAIQVPAIQPRVGRITLFFORTPPVVMRMDRAI         | 215 |
|                                                        | BVMO2_STRCO      | 162 | FHSARWDHD--YDLAGQRVAMIGTGASAIQIVPSIQPKVDRLTLFQRTPAWVMRVDRAI         | 219 |
|                                                        | BVMO_PSEAE       | 178 | FHSQWWDHD--YDLKGRVAVIGTGASAIQFVPEIQPLVAALDLYQRTPPWILPKPDRAI         | 235 |
|                                                        | B8N653_ASPFN     | 168 | YHSAHWPEAEETSVKGGKVAVIGTGSTGQIQFQEWAREAEAEFLFQRTPNLCLPMRQQL         | 227 |
|                                                        |                  |     | :** : * . : : * : : : : : : : : : : * : * * * : * : : : :           |     |
|                                                        | A0A089YZ45_STRGA | 216 | SGAERWLHQ---RFPVTTQ-----ARRGLLWGIREFLQVQAFTHK                       | 251 |
|                                                        | BVMO2_STRCO      | 220 | SGAERALHR---ALPATTK-----LRGLLWGIREFLQVQAFTHK                        | 255 |
|                                                        | BVMO_PSEAE       | 236 | SETERRRFR---RFPLVQK-----LWRGGLYSLLEGRVGLGFTFA                       | 271 |
|                                                        | B8N653_ASPFN     | 228 | HAGYQVKDKGEYADYLAEALTFGGLEYQQTPKNTFDASEEEREAEWEDL-YQMGGFREW         | 286 |
|                                                        |                  |     | : : : : : : : : : : * : : : : : : : : : : : : : : :                 |     |
|                                                        | A0A089YZ45_STRGA | 252 | PGQLG-FV-----EQAKRNMARAIKDP---ALRAKLTPDYRIGCKRILLSSEYYP             | 298 |
|                                                        | BVMO2_STRCO      | 256 | PNELG-FV-----EQIAKRNMGAAIKDP---ALRAKLTPDYRIGCKRILLSSTYYP            | 302 |
|                                                        | BVMO_PSEAE       | 272 | FQVMK-LV-----QRLAIRHIHKQIKDP---ELRRKVTPTYRIGCKRILMSHNYYP            | 318 |
|                                                        | B8N653_ASPFN     | 287 | QNNYQDLSLTDANREAYNFWARTRARIQDPKRDLLAPLEPPYPFQTRPSLEQDFYE            | 346 |
|                                                        |                  |     | : : : : : : * : * : * : * : * : * * : * * : * : : * :               |     |
|                                                        | A0A089YZ45_STRGA | 299 | ALARPNDVVDVAS---GLAEVRGSLVAADGSEAEADAIVFGTGFHVIDM-PIAERVVGAD        | 354 |
|                                                        | BVMO2_STRCO      | 303 | ALAKPNVDVVAS---GLSEVRGSLVAADGTEAEADAIVFGTGFHVIDM-PIAERVVGAD         | 358 |
|                                                        | BVMO_PSEAE       | 319 | ALAAANSTVITE---GIRAVTANGIVDNGREREVDALIFGTGFTANDP-IPRGVVFGRD         | 374 |
|                                                        | B8N653_ASPFN     | 347 | QFNKSNVHIVDTKSOPIVGVVPTGIVTADKEVHEVDIIAVATGFDAVTTGGLRLGLKDVN        | 406 |
|                                                        |                  |     | : * : : : : * : * : * : * : * : * : * : * : * : : * :               |     |
|                                                        | A0A089YZ45_STRGA | 355 | GRTLAEVWKGMEALRGASAAAGFPNWMNTIIGPNTGLGNSSMILMIESQLNLYLADFIQLD       | 414 |
|                                                        | BVMO2_STRCO      | 359 | GRTLAEVWKGMEALRGGTAAGFPNFMNTIIGPNTGLGNSSMILMIESQLNLYLADFIQLD        | 418 |
|                                                        | BVMO_PSEAE       | 375 | GRDLLDSWSKGPPEAYKGTTFAGFPNLFLLMGPNLTGLGHNSMVMYIESQIAVLDALKLMK       | 434 |
|                                                        | B8N653_ASPFN     | 407 | GVGLDERWKGDMSTYLGMAISGFPNMFPLYSLOAPTAFANGPTLIEIQGDWITSLIRKME        | 466 |
|                                                        |                  |     | * * : * . * : : * : : * * : : . : : . : . : * * * : : : : : :       |     |
|                                                        | A0A089YZ45_STRGA | 415 | VLGGRVALDARPGAVGANNRRVOERMKRTVWNTGGCTSWSYLDG-N-GRNT--TIWPGTTA       | 470 |
|                                                        | BVMO2_STRCO      | 419 | VLGGRTALDPRPAAVRNWNRVOERMKRTVWNTGGCTSWSYLDG-S-GRNT--TWWPGTTA        | 474 |
|                                                        | BVMO_PSEAE       | 435 | RR-ELLSLEVKAIPVQERYNEYLQRLDRSVWSVGGCKSWYLPVVS-GRNC--TWWPGFTW        | 490 |
|                                                        | B8N653_ASPFN     | 467 | ME-NVQSVTATPHAESAWNDDEVNMIANKTLLP--LTDWSYMGSNIPGKVPQSLNYLGGLP       | 523 |
|                                                        |                  |     | : : : : . : * : * : : : : : : : : : : : : * * * : * : * :           |     |
|                                                        | A0A089YZ45_STRGA | 471 | EFRRATR-RVDLMEYEVLRPFAAKAGGDAPESGKHSAAAGTEAAL--                     | 514 |
|                                                        | BVMO2_STRCO      | 475 | EFRRETR-RVDLAEYQVLRPAPAQVGAKEADTGA-DTGADAEVSA                       | 519 |
|                                                        | BVMO_PSEAE       | 491 | RFRALTR-CFDASAYHLTTTFLAALSNEARQQAEGVPA-----                         | 527 |
|                                                        | B8N653_ASPFN     | 524 | TYRERCAKVLDEDFPFKA-----                                             | 543 |
|                                                        |                  |     | : * : * : * : : : : : : : : : : : : : : : : : : : : :               |     |

**Fig. S1.** Multiple sequence alignment of a putative BVMO enzyme in the genome of *Streptomyces glaucescens* GLA.0 (A0A089Y245\_STRGA). The Uniprot Accession number is A0A089YZ45 and Gene Bank Accession number is CP009438.1. The alignment shows sequence identity with SCO3172BVMO, a Baeyer-Villiger monooxygenase from *Streptomyces coelicolor* A3(2) (Gene Bank Accession No. CAB55657.1), PA1538BVMO, a BVMO from *Pseudomonas aeruginosa* PAO1 (Gene Bank Accession No. AAG04927.1) and BVMOAFL838, a BVMO from *Aspergillus flavus*.

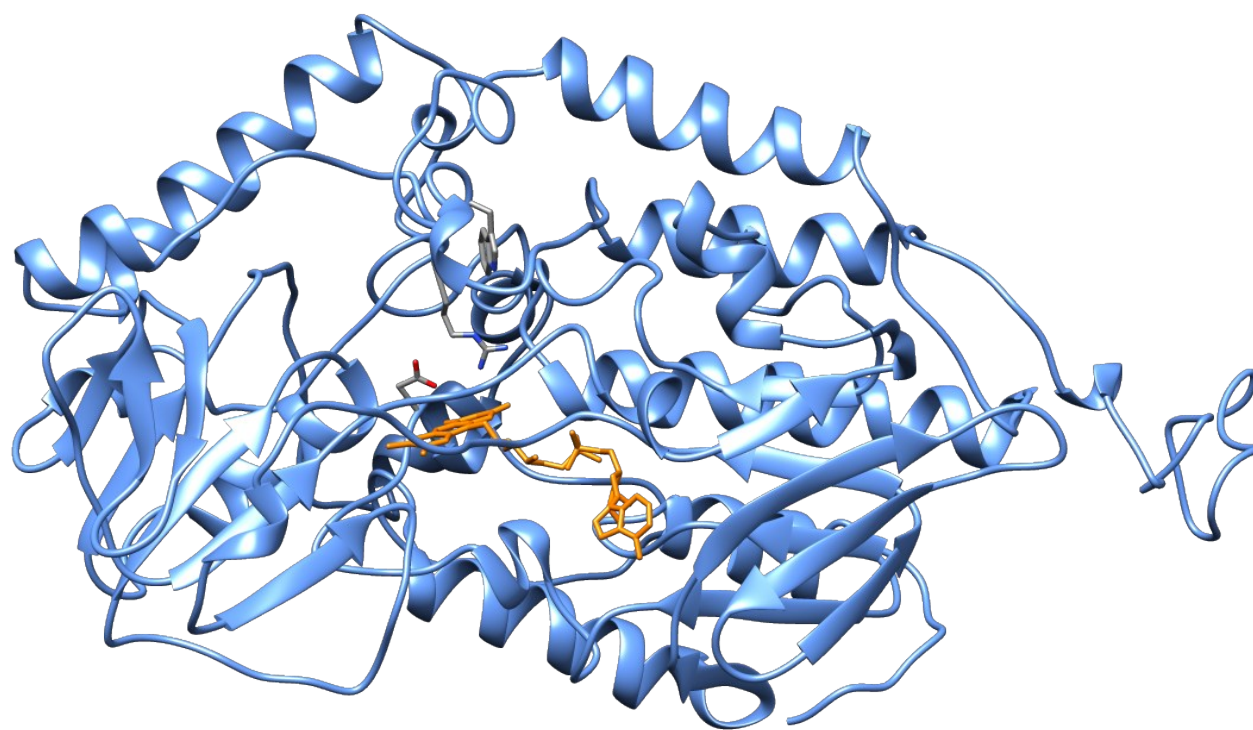

**Fig. S2.** A homology model of the putative BVMO identified in the genome of *S. glaucescens* GLA.0. The model was constructed using I-Tasser server.

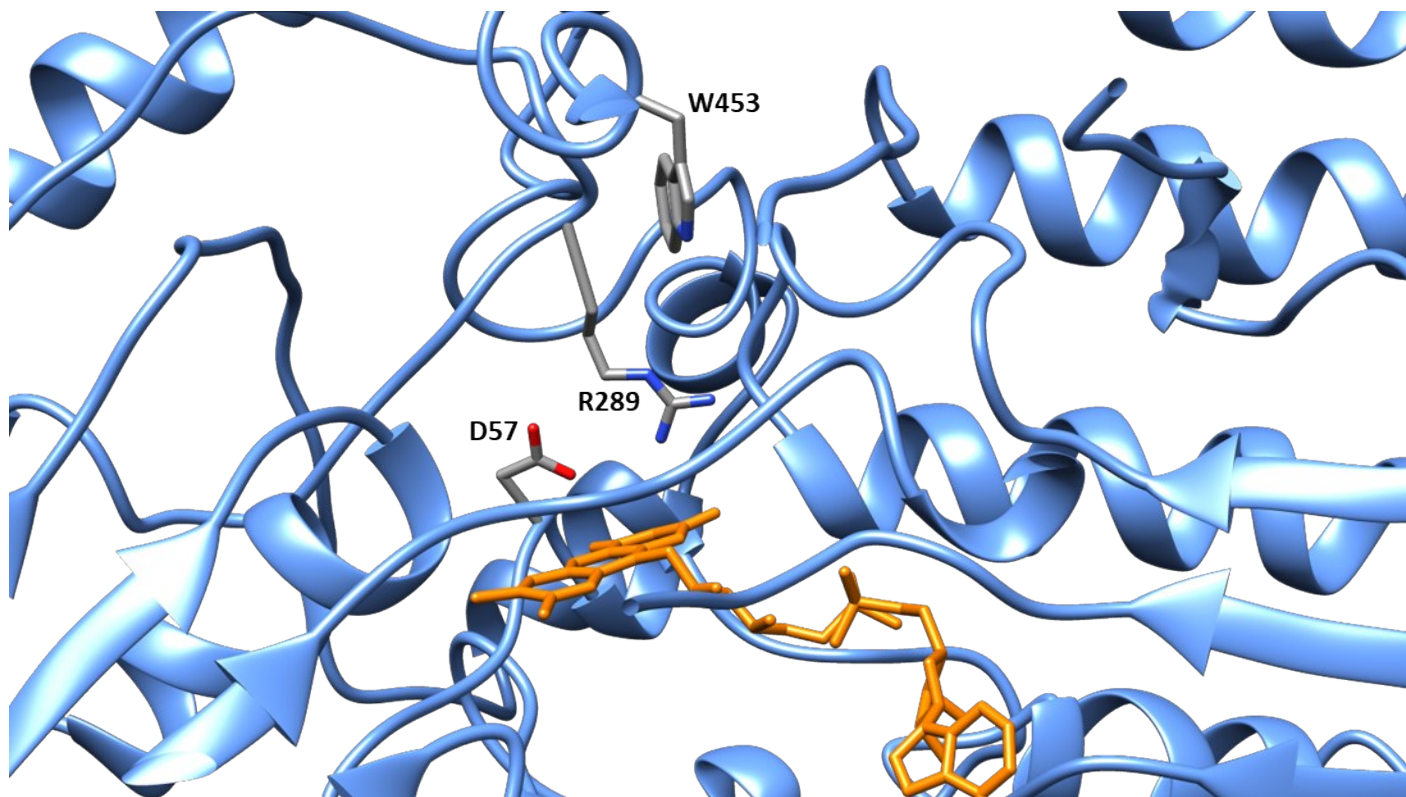

**Fig. S3.** Zoom-in view of the active site of the putative BVMO in *S. glaucescens* GLA.0. The residues Arg289 and Asp57 are conserved residues that contribute to substrate binding.

Abundance

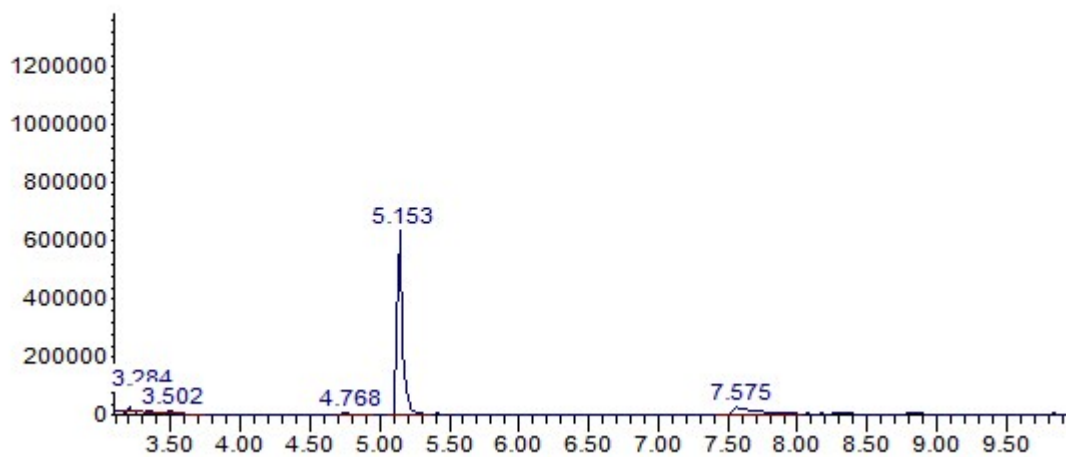

Time-->

**Fig. S4.** GC chromatogram of phenyl methyl sulfide at the beginning of the reaction. PMS was added in an amount to form a 1 mM concentration in Medium 2. The retention time of PMS at zero time is 5.1 min.

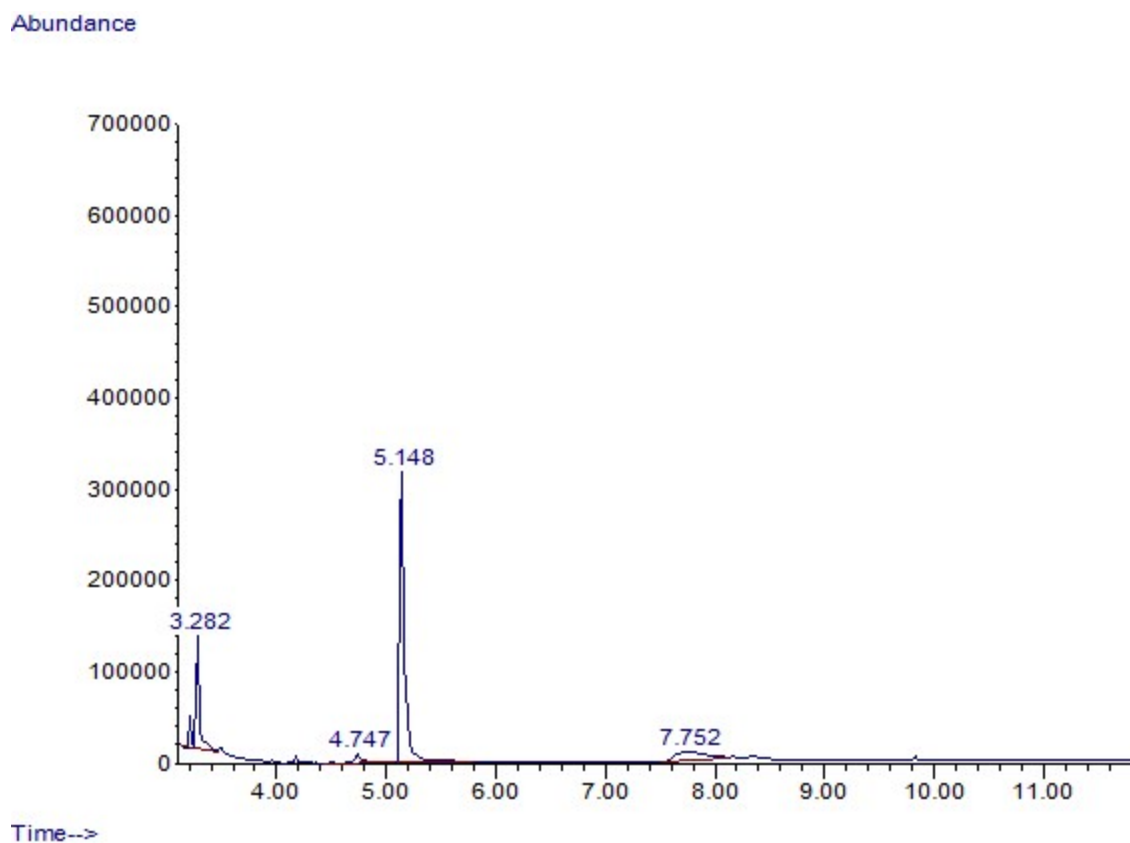

**Fig. S5.** GC chromatogram of phenyl methyl sulfide in a control reaction. PMS was added at an initial concentration of 1 mM to Medium 2. The reading was taken after 72 h from the beginning of the reaction and the experiment was done without the addition of bacterial culture. PMS was eluted at a retention time of 5.1 min.



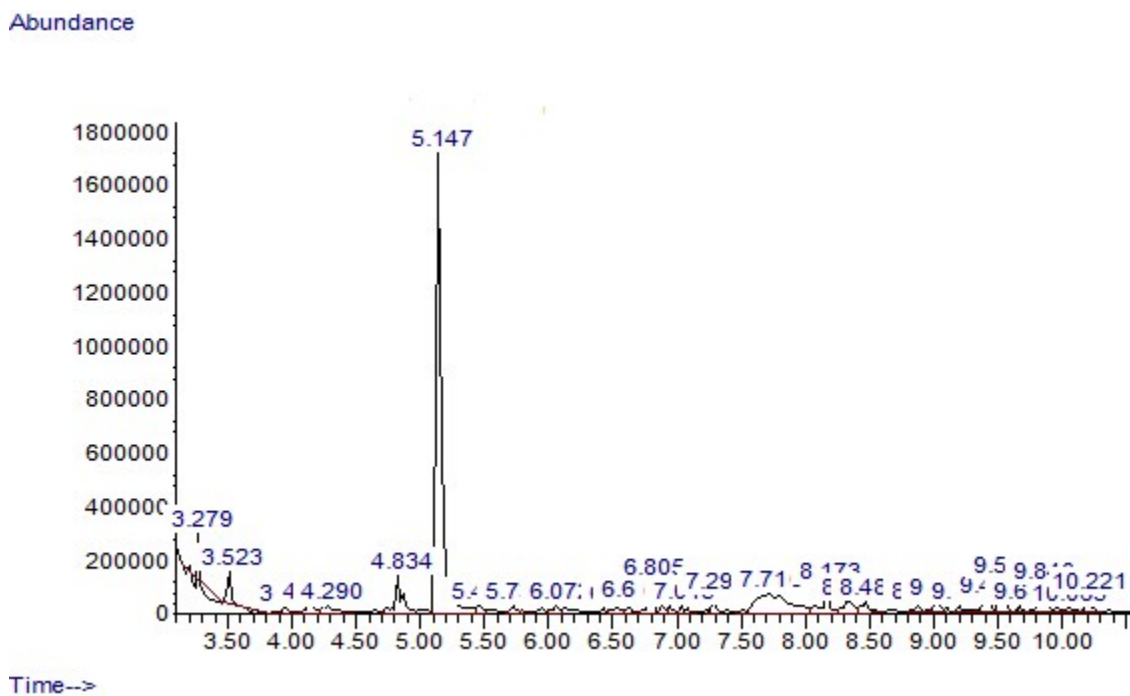

**Fig. S6.** Full scan GC chromatogram of phenyl methyl sulfide showing the effect of agitation on the biotransformation process. PMS was added at an initial concentration of 1 mM to Medium 3. The sample was taken after 72 h from the beginning of the reaction to give a PMS retention time of 5.1 min and a very small amount of PMSO at 7.7 min. The experiment was performed without agitation.

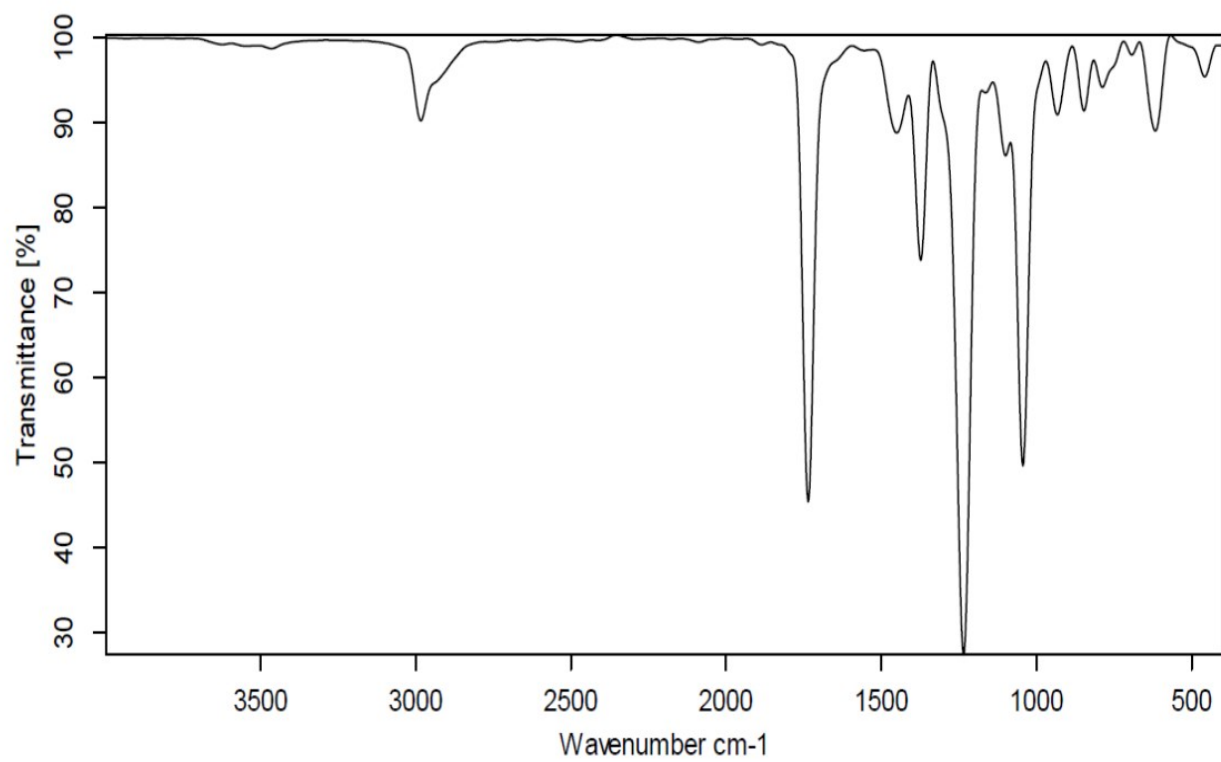

**Fig. S7.** IR spectrum of the chemically synthesized phenyl methyl sulfoxide.

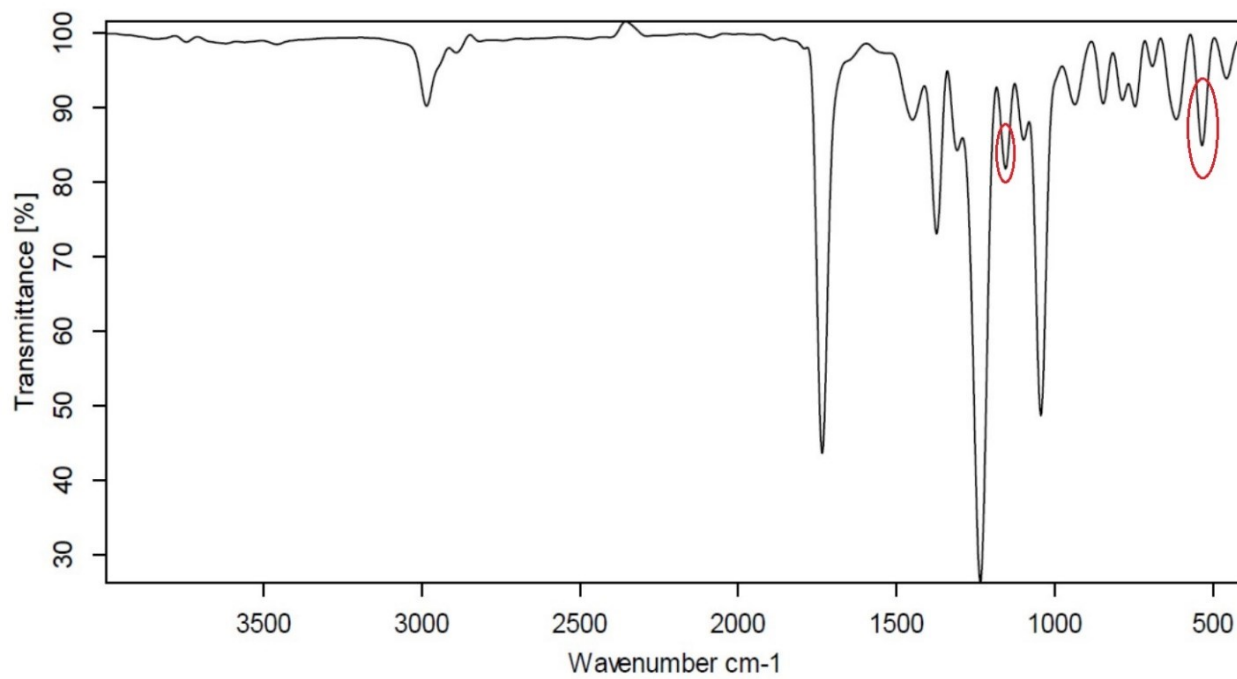

**Fig. S8.** IR spectrum of the chemically synthesized phenyl methyl sulfone.

Abundance

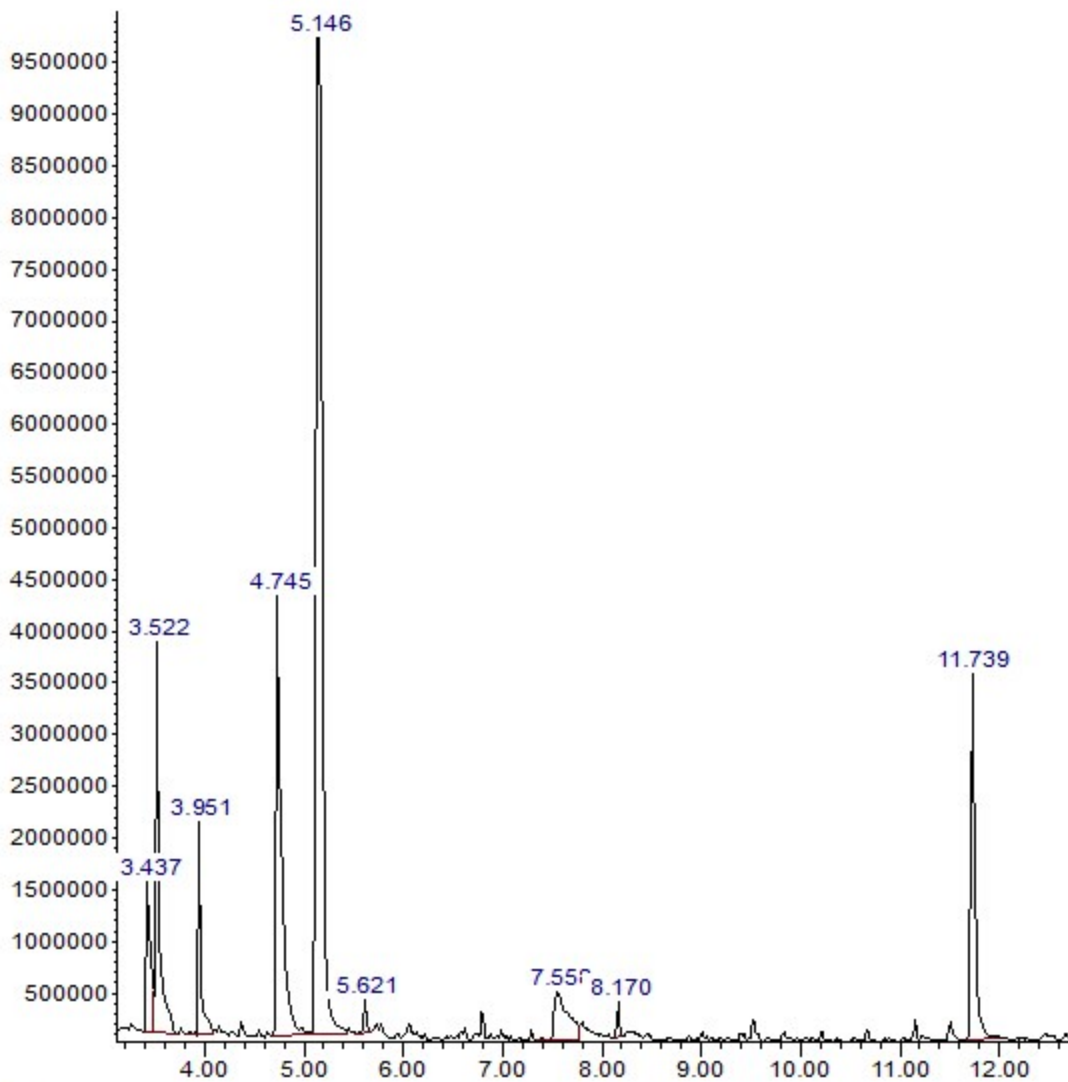

Time-->

**Fig. S9.** Full scan GC chromatogram showing the formation of PMSO ( $R_t = 7.5$  min) after 15 h from the beginning of the reaction. This chromatogram was taken from a sample withdrawn after 15 h from the beginning of the biotransformation of phenyl methyl sulfide (added at an initial concentration of 3 mM) by growing cells of *Streptomyces glaucescens* GLA0.

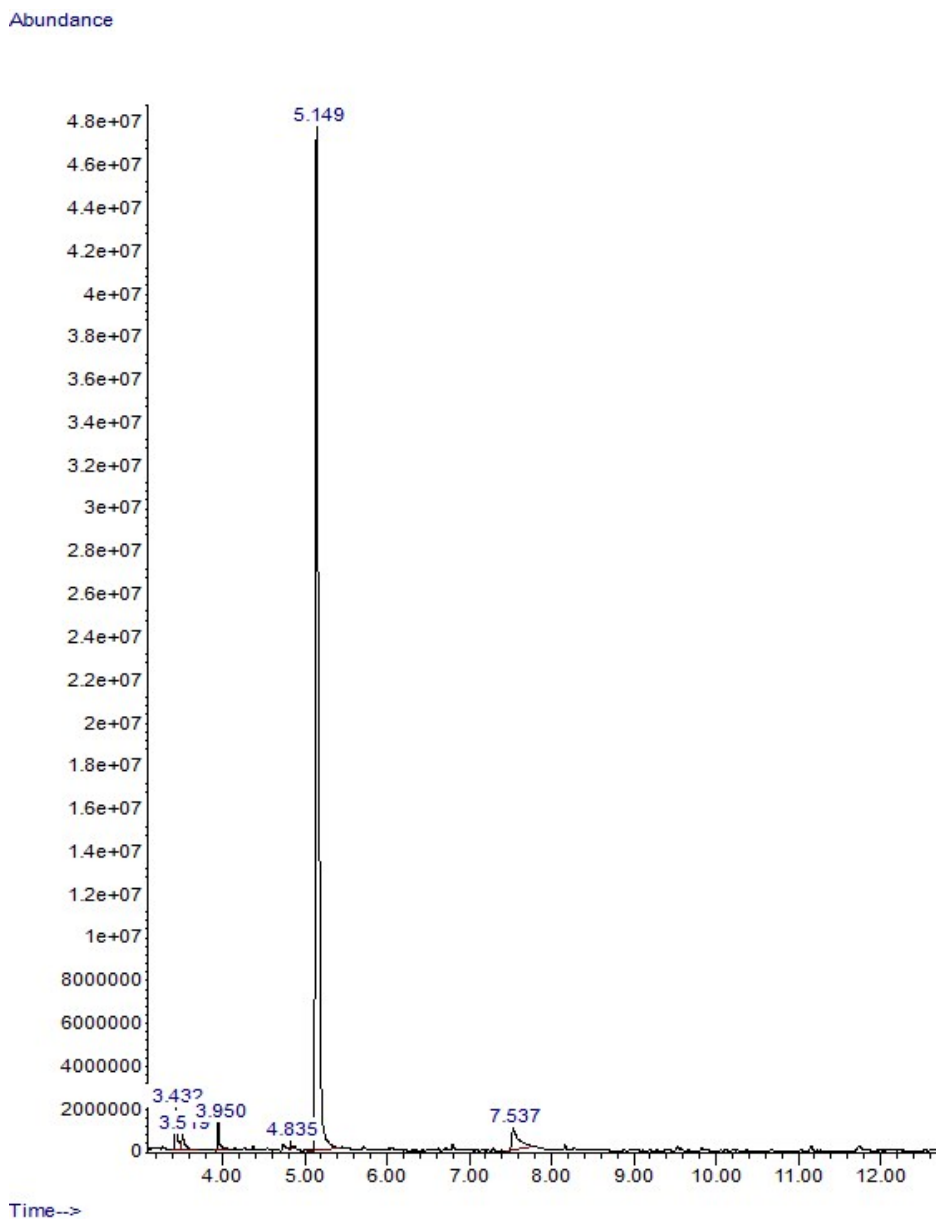

**Fig. S10.** Full scan GC chromatogram showing the formation of PMSO ( $R_t = 7.5$  min) after 6 h from the beginning of the reaction. This chromatogram was taken from a sample withdrawn after 6 h from the beginning of the biotransformation of phenyl methyl sulfide (added at an initial concentration of 5 mM) by growing cells of *Streptomyces glaucescens* GLA0.

Abundance

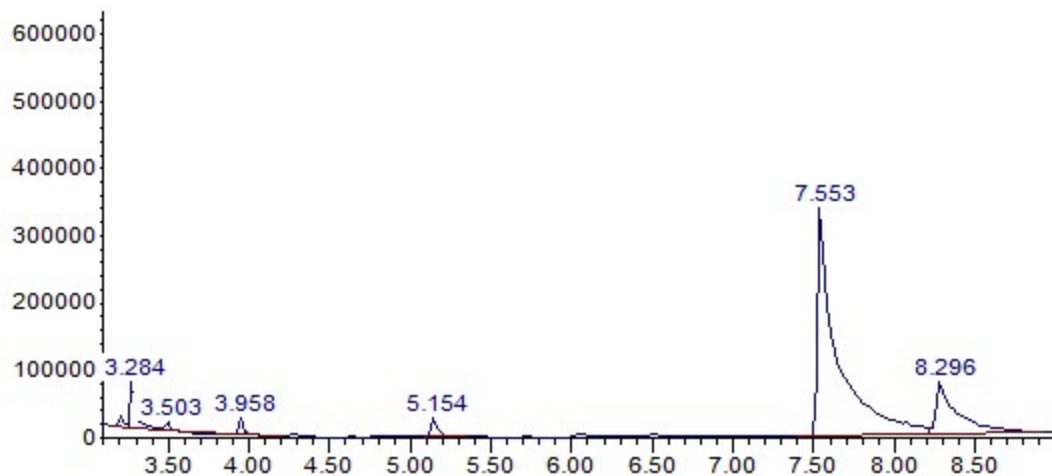

Time-->

**Fig. S11.A** The effect of co-solvent addition on PMSO and sulfone formation. The GC chromatogram shows PMSO ( $R_t = 7.5$  min) and phenyl methyl sulfone ( $R_t = 8.3$  min) formed under conditions of reaction **A** (see **Table 1**). The sample was taken after 96 h from the beginning of the reaction.

Abundance

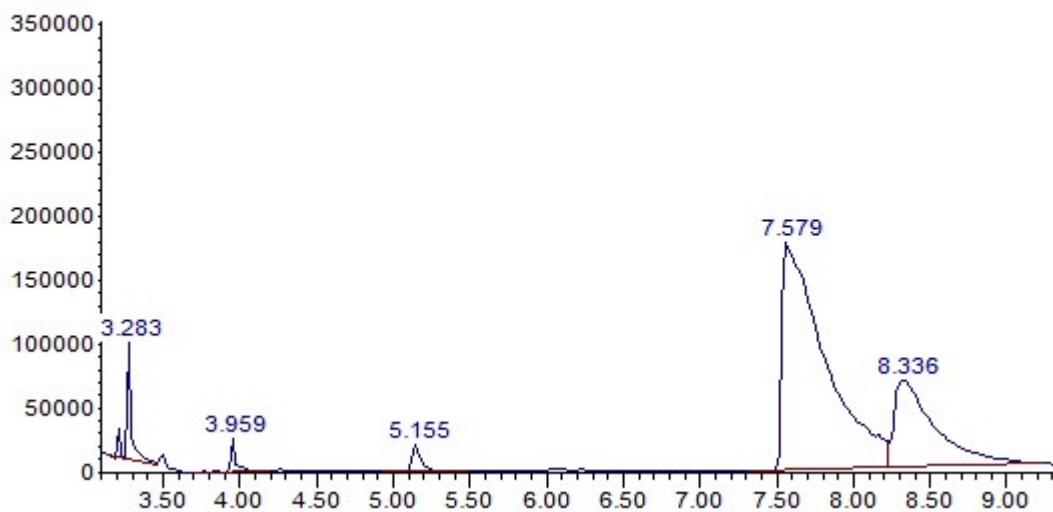

Time-->

**Fig. S11.B** The effect of co-solvent addition on PMSO and sulfone formation. The GC chromatogram shows PMSO ( $R_t = 7.5$  min) and phenyl methyl sulfone ( $R_t = 8.3$  min) formed under conditions of reaction **B** (see **Table 1**). The sample was taken after 96 h from the beginning of the reaction.

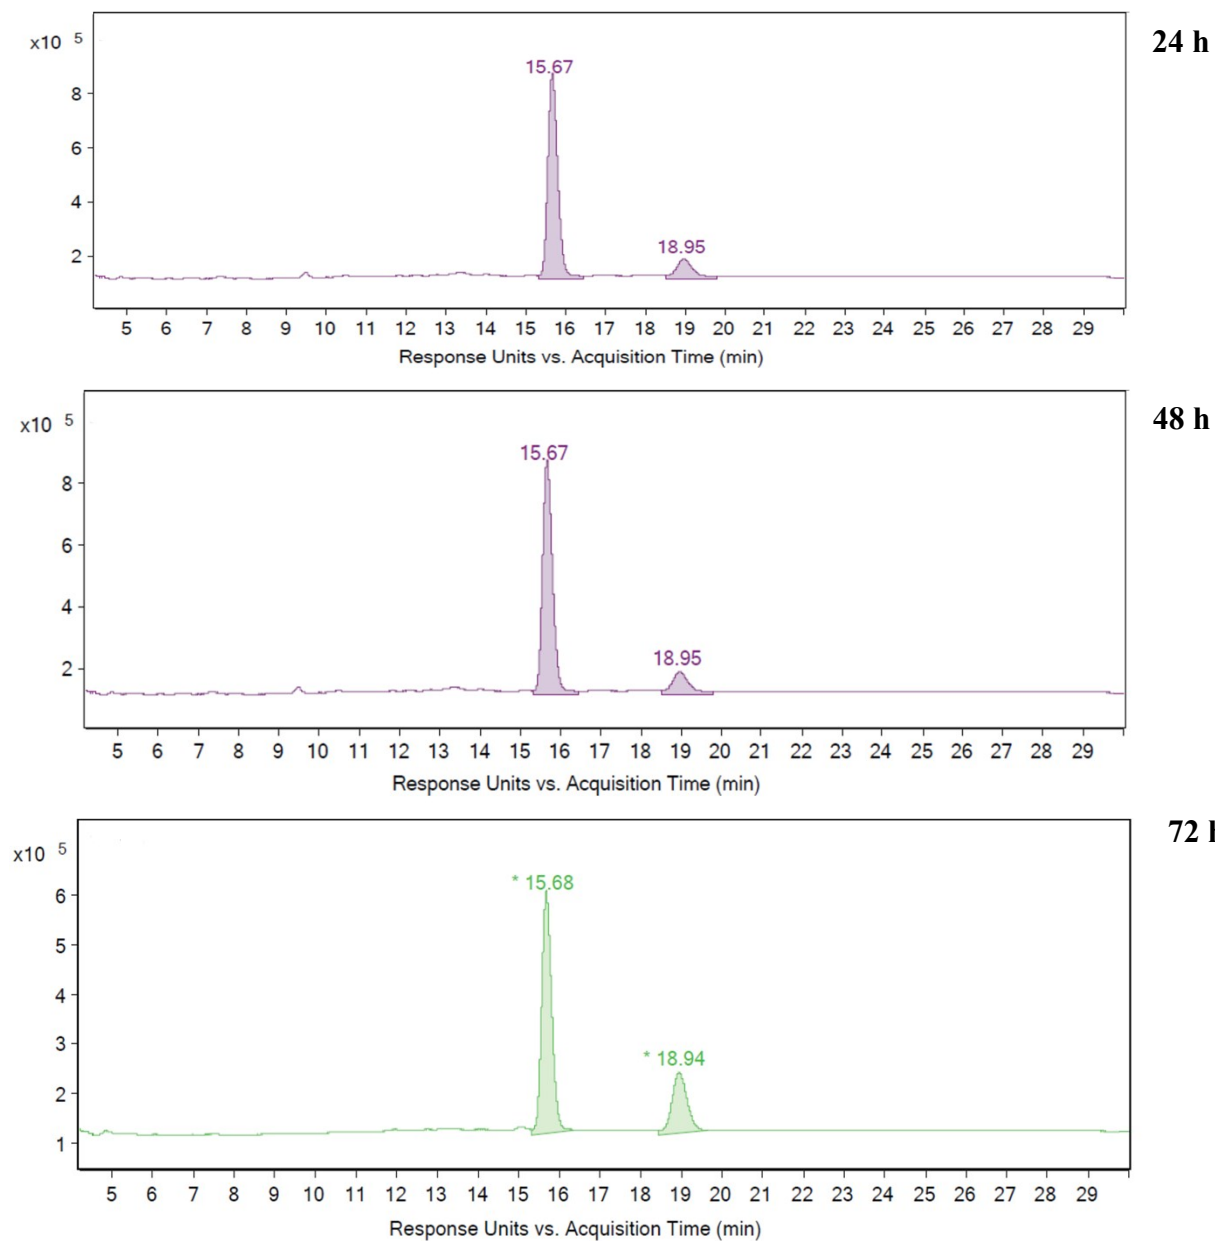

**Fig. S12.** Chiral GC chromatograms showing oxidized products formed from PMS biooxidation by the whole cells of *Streptomyces glaucescens* GLA.0 under conditions of reaction (C). Samples were taken after 24 h, 48 h, and 72 h, respectively. Retention times of *R*-PMSO and phenyl methyl sulfone were 15.6 min and 18.9 min, respectively.



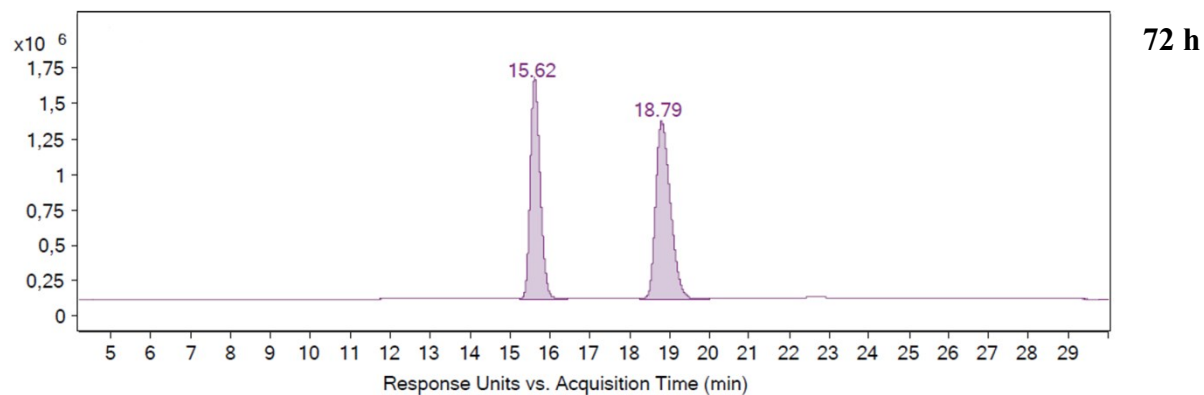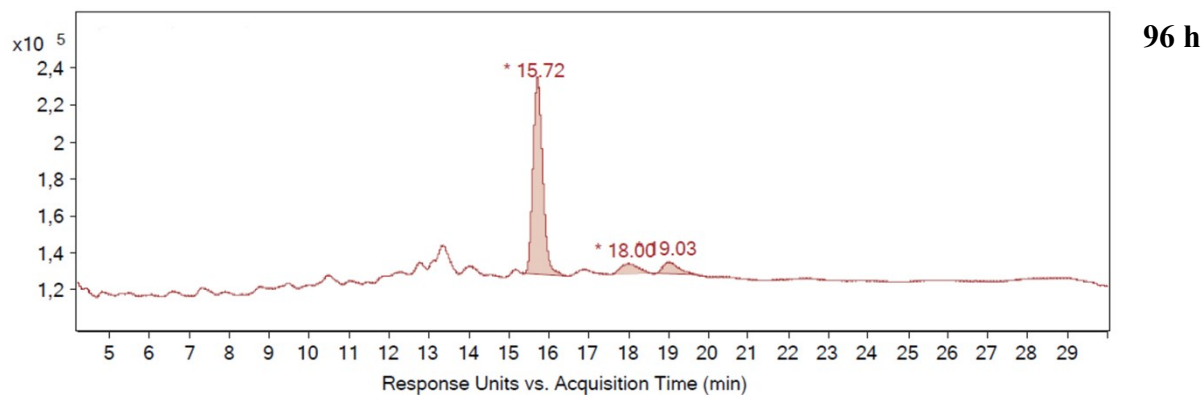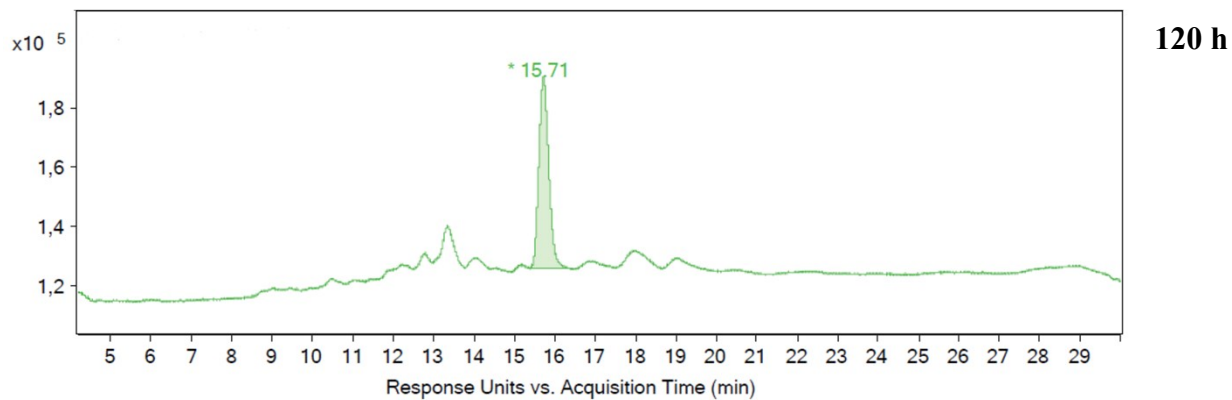

**Fig. S13.** Chiral GC chromatograms showing oxidized products formed from PMS biooxidation by the whole cells of *Streptomyces glaucescens* GLA.0 under conditions of reaction (D). Samples were taken after 72 h, 96 h and 120 h, respectively. Retention times of *R*-PMSO, *S*-PMSO and phenyl methyl sulfone were 15.6 min, 18-18.7 min and 19 min, respectively.

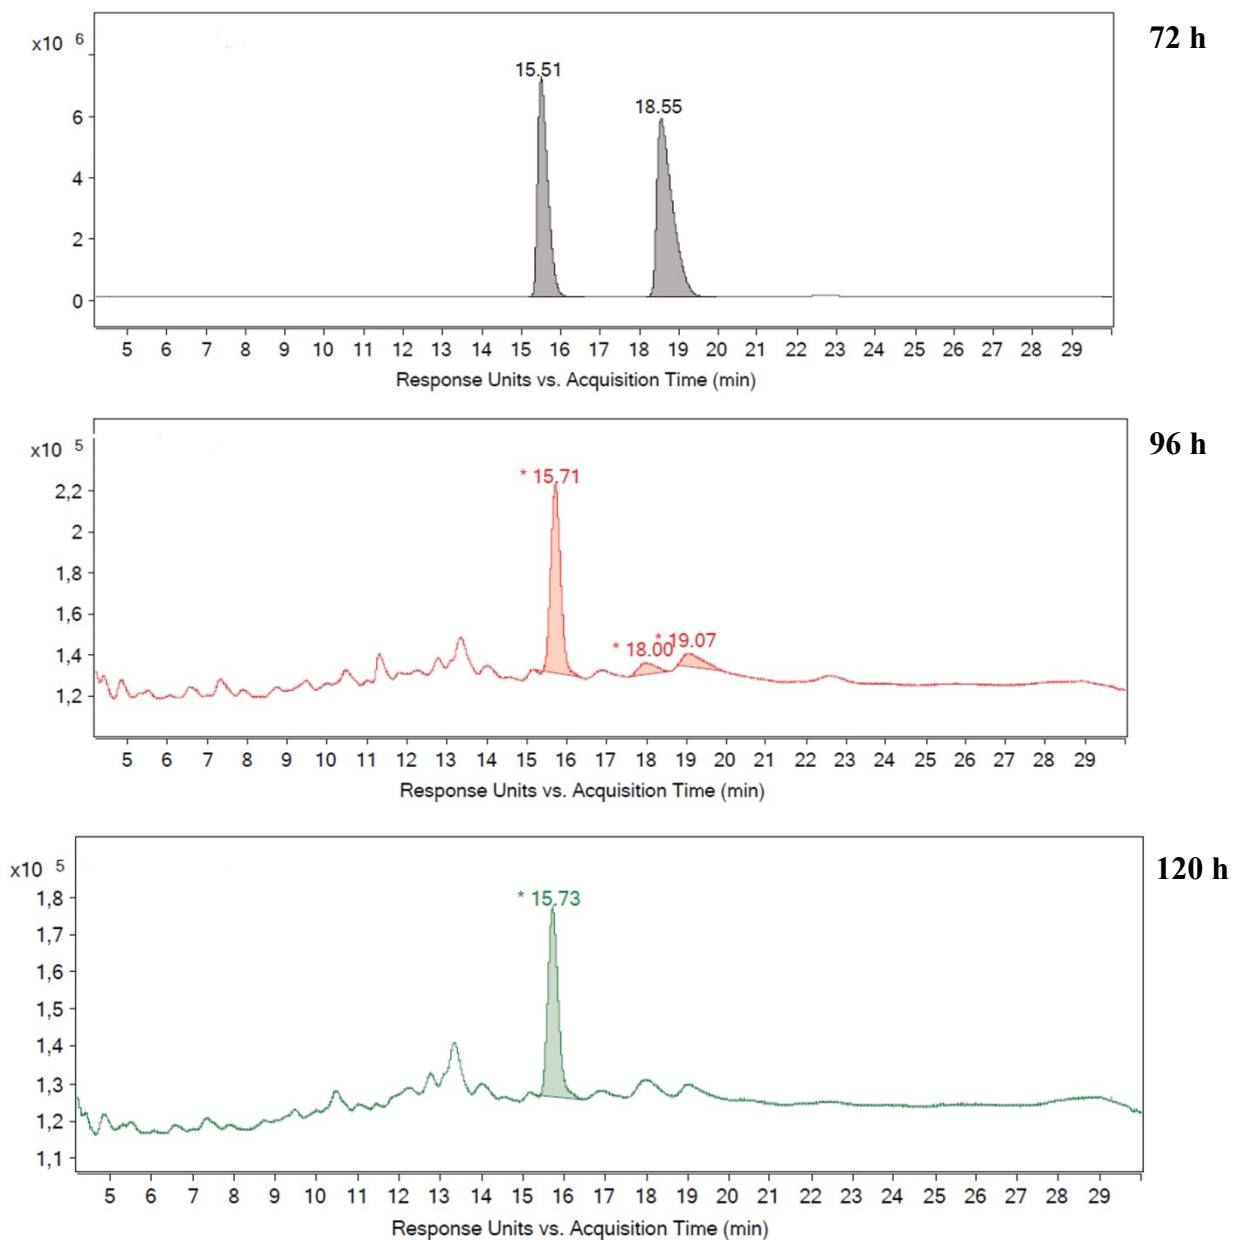

**Fig. S14.** Chiral GC chromatograms showing oxidized products formed from PMS biooxidation by the whole cells of *Streptomyces glaucescens* GLA.0 under conditions of reaction (I). Samples were taken after 72 h, 96 h and 120 h, respectively. Retention times of *R*-PMSO, *S*-PMSO and phenyl methyl sulfone were 15.5-15.7 min, 18-18.5 min and 19 min, respectively.

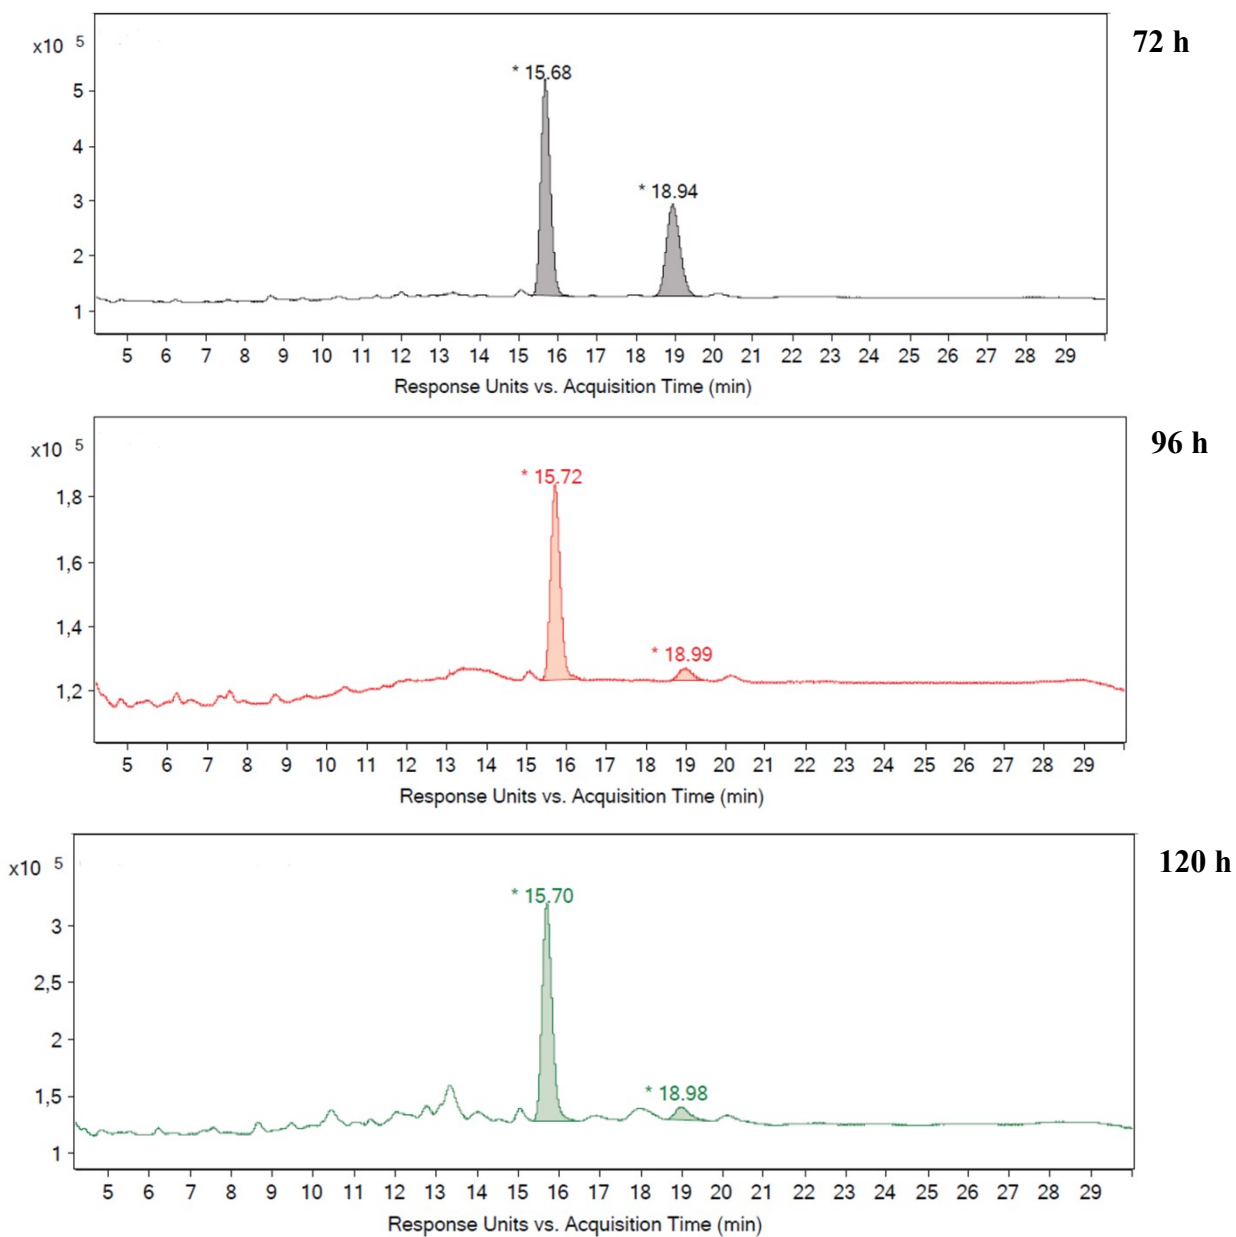

**Fig. S15.** Chiral GC chromatograms showing oxidized products formed from PMS biooxidation by the whole cells of *Streptomyces glaucescens* GLA.0 under conditions of reaction (J). Samples were taken after 72 h, 96 h and 120 h, respectively. Retention times of *R*-PMSO and phenyl methyl sulfone were 15.6-15.7 min and 18.9 min, respectively.

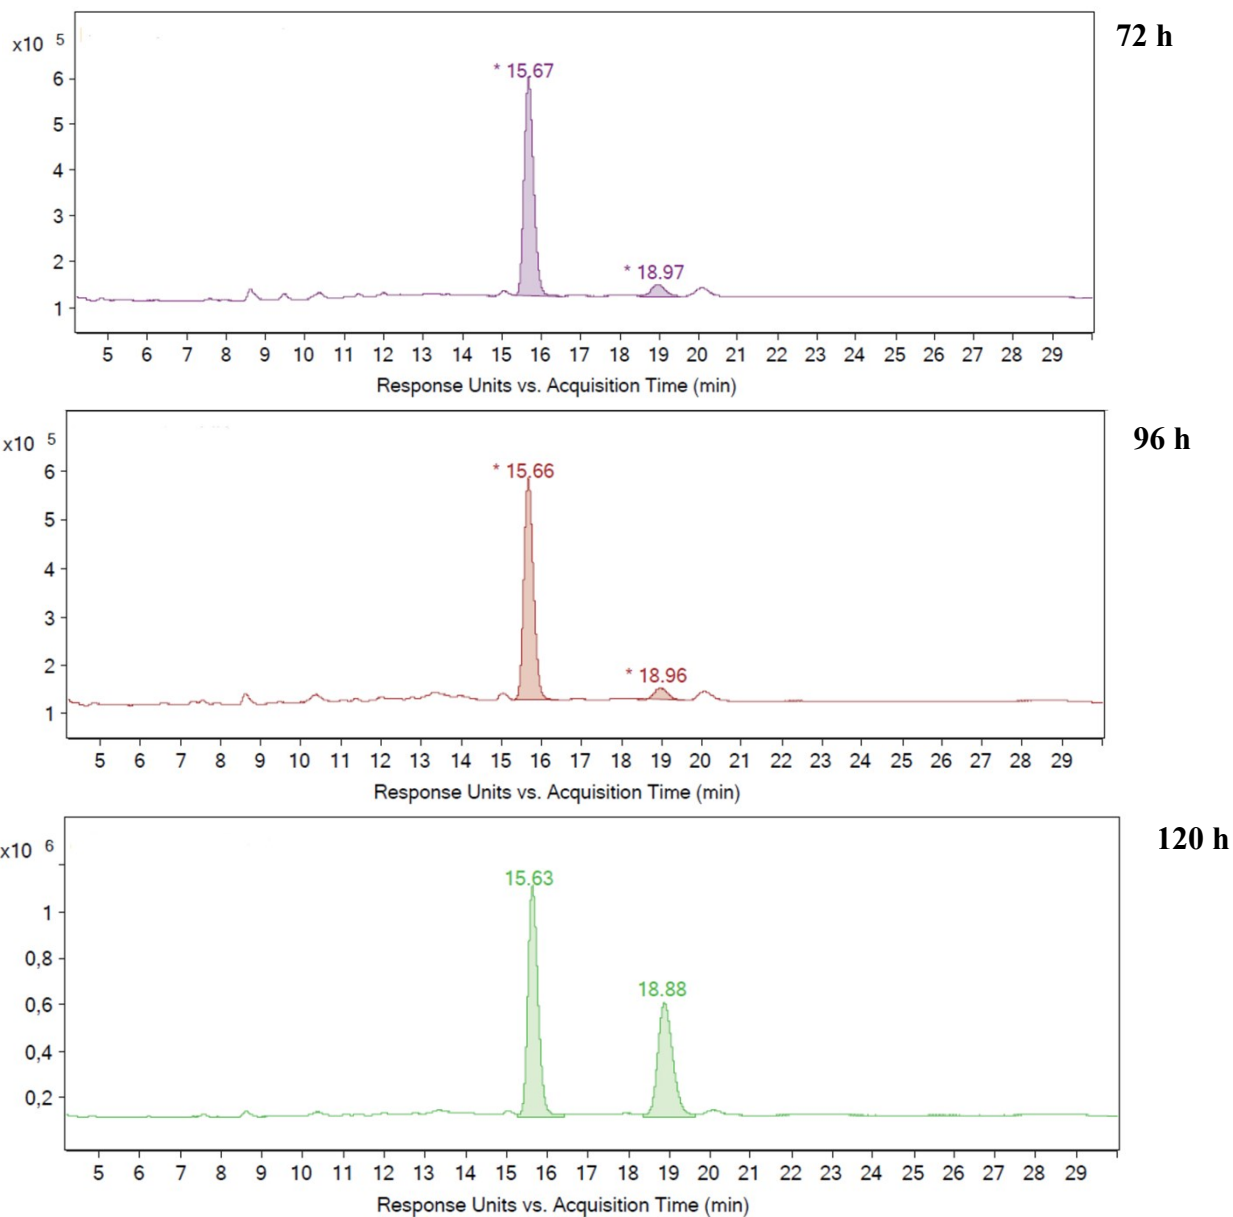

**Fig. S16.** Chiral GC chromatograms showing oxidized products formed from PMS biooxidation by the whole cells of *Streptomyces glaucescens* GLA.0 under conditions of reaction (K). Samples were taken after 72 h, 96 h and 120 h, respectively. Retention times of *R*-PMSO and phenyl methyl sulfone were 15.6 min and 18.8-18.9 min, respectively.

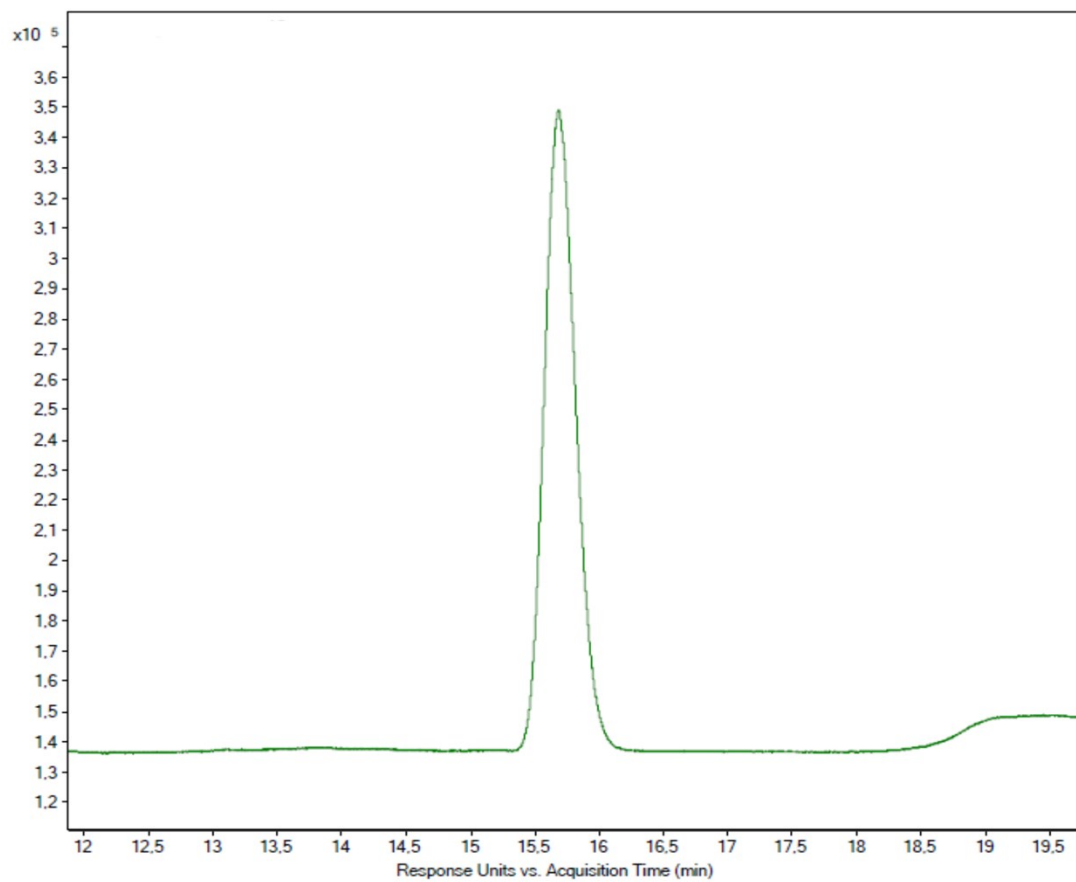

**Fig. S17.** Chiral GC chromatogram showing *R*-PMSO ( $R_t = 15.5$  min) produced from enzymatic oxidation of PMS using phenyl acetone monooxygenase (PAMO).

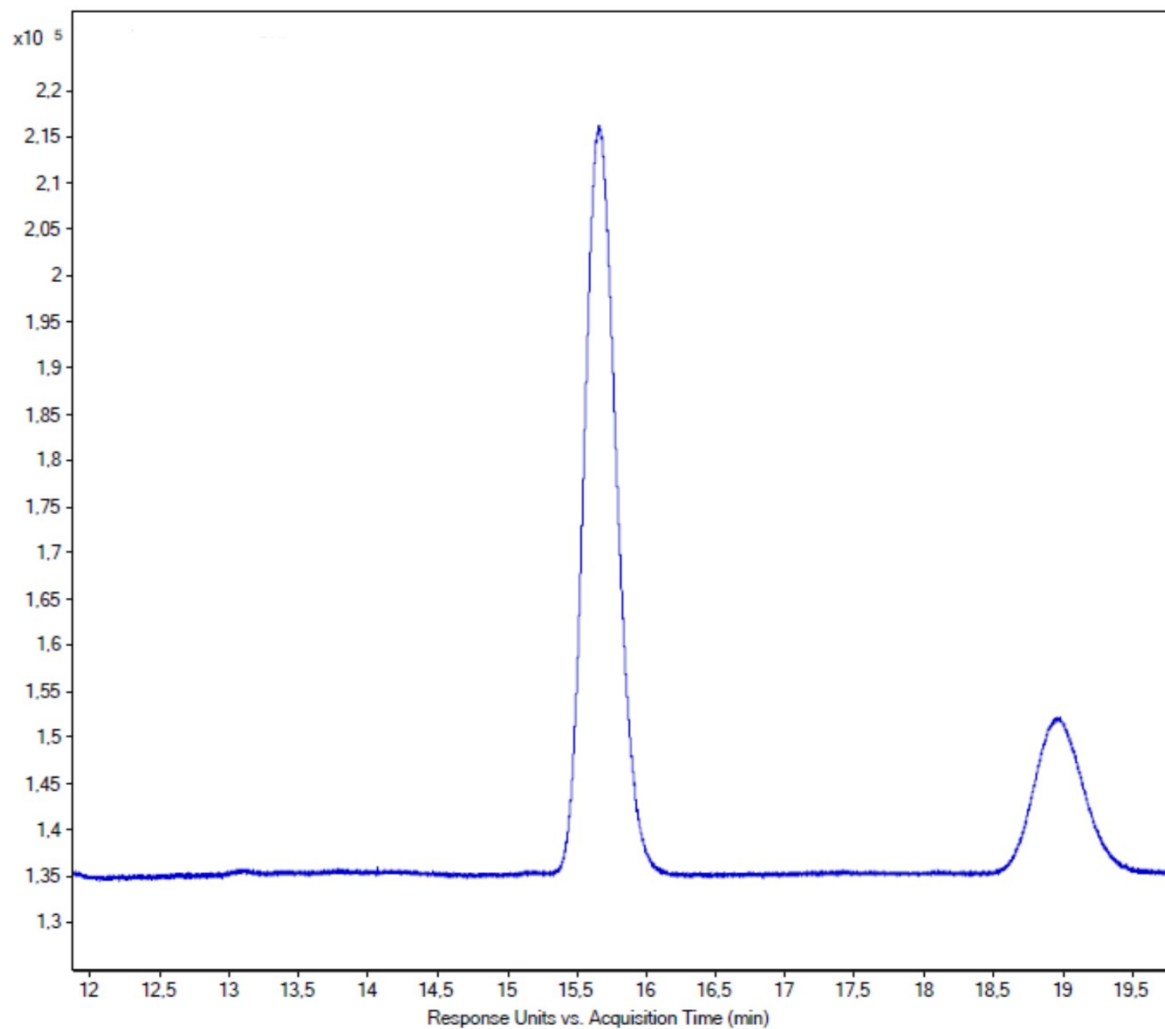

**Fig. S18.** Chiral GC chromatogram showing *R*-PMSO ( $R_t=15.5$  min) produced from the enzymatic oxidation of PMS using cyclohexanone monooxygenase (CHMO).

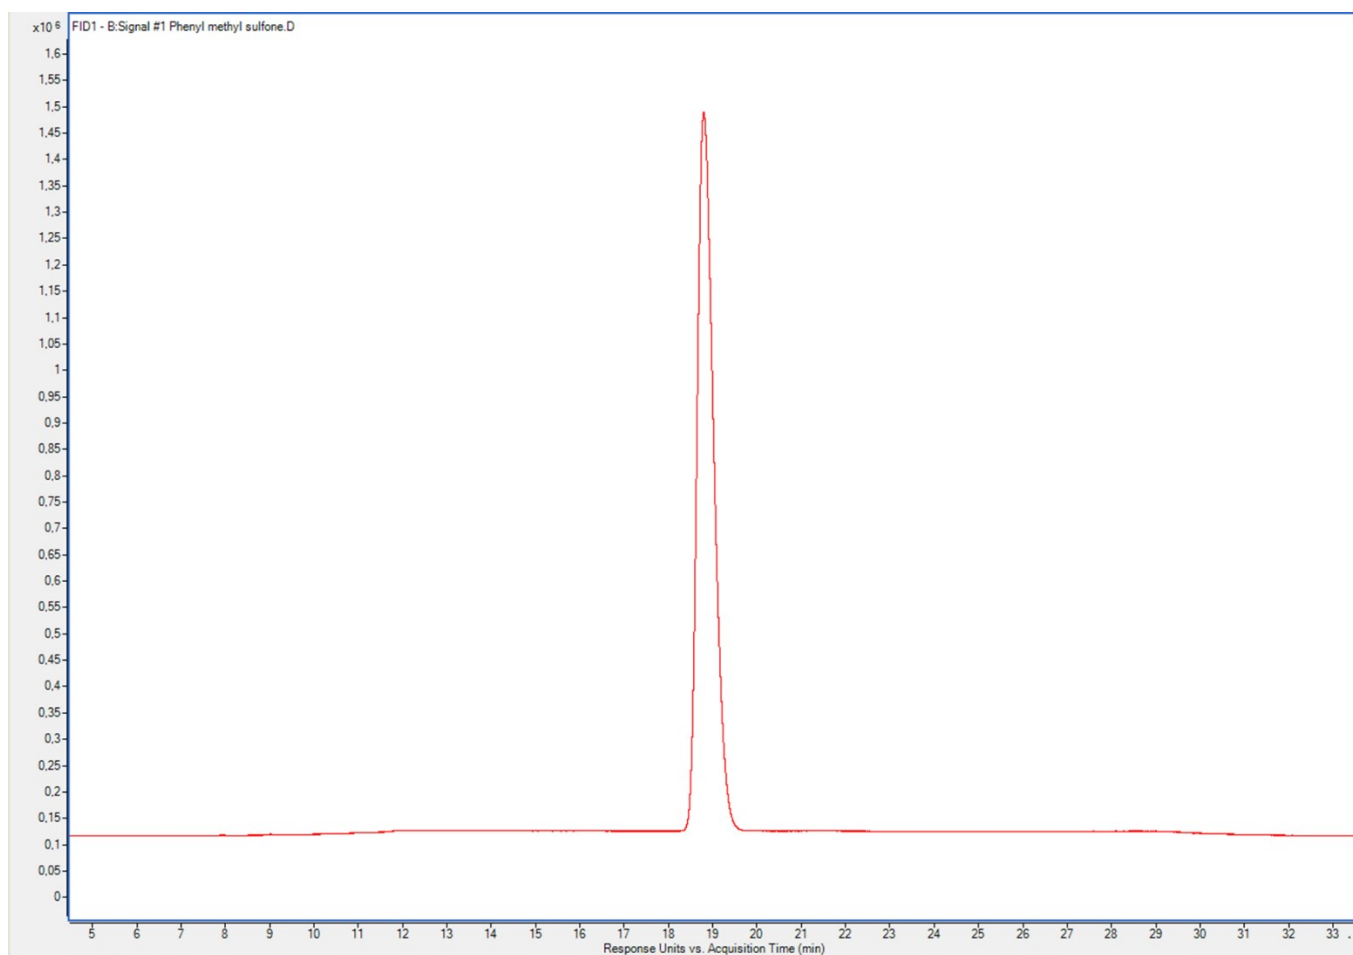

**Fig. S19.** Chiral GC chromatogram showing standard phenyl methyl sulfone ( $R_t = 18.8$  min).

**Table S1.** Preliminary biotransformation experiments of PMS biooxidation using *S. glaucescens* GLA0 and their effects on PMS biotransformation.

| Reaction | Substrate Conc. | Co solvent (%v/v) | Time of substrate addition | Reaction medium | RPM | Sampling Time <sup>[1]</sup> | PMS C% <sup>[2]</sup> | PMSO C% <sup>[2]</sup> | Sulfone C% <sup>[2]</sup> | Configuration <sup>[3]</sup> | ee% <sup>[3]</sup> |
|----------|-----------------|-------------------|----------------------------|-----------------|-----|------------------------------|-----------------------|------------------------|---------------------------|------------------------------|--------------------|
| <b>A</b> | 1.0 mM          | IPA (0.2%)        | 3 <sup>rd</sup> day        | Medium 3        | 150 | 120                          | 19                    | 71                     | 10                        | ND                           | ND                 |
|          |                 |                   |                            |                 |     | 144                          | 7                     | 77                     | 16                        |                              |                    |
|          |                 |                   |                            |                 |     | 168                          | 2                     | 78                     | 20                        |                              |                    |
| <b>B</b> | 1.0 mM          | None              | 3 <sup>rd</sup> day        | Medium 3        | 150 | 120                          | 39                    | 57                     | 4                         | ND                           | ND                 |
|          |                 |                   |                            |                 |     | 144                          | 8                     | 74                     | 18                        |                              |                    |
|          |                 |                   |                            |                 |     | 168                          | 1                     | 75                     | 24                        |                              |                    |
| <b>C</b> | 1.0 mM          | None              | 3 <sup>rd</sup> day        | Medium 3        | 180 | 96                           | 1                     | 56                     | 43                        | <i>R</i>                     | >99                |
|          |                 |                   |                            |                 |     | 120                          | 1                     | 83                     | 17                        | <i>R</i>                     | >99                |
|          |                 |                   |                            |                 |     | 144                          | 1                     | 50                     | 49                        | <i>R</i>                     | >99                |
| <b>D</b> | 1.0 mM          | None              | Zero                       | Medium 3        | 180 | 72                           | 7                     | 80                     | 13                        | <i>S</i>                     | 9                  |
|          |                 |                   |                            |                 |     | 96                           | 3                     | 82                     | 15                        | <i>R</i>                     | 83                 |
|          |                 |                   |                            |                 |     | 120                          | 2                     | 83                     | 15                        | <i>R</i>                     | >99                |

[1] Addition of the substrate at zero time of inoculation or at the 3<sup>rd</sup> day. Sampling time was calculated from the beginning of the experiment.

[2] Relative amount of phenyl methyl sulfide, phenyl methyl sulfoxide and phenyl methyl sulfone in reaction samples as calculated by GC-MS.

[3] Configurations and (*ee* %) enantiomeric excess values were analyzed by chiral GC-FID,

ND – not determined



**Table S2.** Optimization of the biotransformation experiments using the whole growing cells of *S. glaucescens* GLA0.

| Reaction | Substrate Conc. | IPA Conc. (% v/v) | Reaction medium | RPM | Sampling Time <sup>[1]</sup> | PMS C% <sup>[2]</sup> | PMSO C% <sup>[2]</sup> | Sulfone C% <sup>[2]</sup> | Configuration <sup>[3]</sup> | ee% <sup>[3]</sup> |
|----------|-----------------|-------------------|-----------------|-----|------------------------------|-----------------------|------------------------|---------------------------|------------------------------|--------------------|
| <b>E</b> | 1.0 mM          | 0.2%              | Medium 2        | 150 | 72                           | 9                     | 79                     | 12                        | ND                           | ND                 |
|          |                 |                   |                 |     | 120                          | 9                     | 70                     | 21                        |                              |                    |
|          |                 |                   |                 |     | 144                          | 12                    | 65                     | 23                        |                              |                    |
|          |                 |                   |                 |     | 168                          | 7                     | 63                     | 30                        |                              |                    |
| <b>F</b> | 1.0 mM          | 0.2%              | Medium 3        | 150 | 72                           | 45                    | 55                     | 0                         | ND                           | ND                 |
|          |                 |                   |                 |     | 120                          | 15                    | 68                     | 17                        |                              |                    |
|          |                 |                   |                 |     | 144                          | 5                     | 71                     | 24                        |                              |                    |
|          |                 |                   |                 |     | 168                          | 1                     | 61                     | 38                        |                              |                    |
| <b>G</b> | 5.0 mM          | 1%                | Medium 3        | 150 | 72                           | 10                    | 76                     | 14                        | ND                           | ND                 |
|          |                 |                   |                 |     | 120                          | 5                     | 73                     | 22                        |                              |                    |
|          |                 |                   |                 |     | 144                          | 6                     | 61                     | 33                        |                              |                    |
|          |                 |                   |                 |     | 168                          | 3                     | 54                     | 43                        |                              |                    |
| <b>H</b> | 5.0 mM          | 1%                | Medium 2        | 150 | 72                           | 4                     | 83                     | 13                        | ND                           | ND                 |
|          |                 |                   |                 |     | 120                          | 5                     | 83                     | 12                        |                              |                    |
|          |                 |                   |                 |     | 144                          | 7                     | 79                     | 14                        |                              |                    |
|          |                 |                   |                 |     | 168                          | 7                     | 80                     | 13                        |                              |                    |
| <b>I</b> | 1.0 mM          | 0.2%              | Medium 3        | 180 | 72                           | 2                     | 43                     | 55                        | <i>S</i>                     | 11                 |
|          |                 |                   |                 |     | 96                           | 2                     | 63                     | 35                        | <i>R</i>                     | 82                 |
|          |                 |                   |                 |     | 120                          | 0                     | 81                     | 19                        | <i>R</i>                     | >99                |
| <b>J</b> | 1.0 mM          | 0.2 %             | Medium 2        | 180 | 72                           | 18                    | 71                     | 11                        | <i>R</i>                     | >99                |
|          |                 |                   |                 |     | 96                           | 6                     | 90                     | 4                         | <i>R</i>                     | >99                |
|          |                 |                   |                 |     | 120                          | 2                     | 90                     | 8                         | <i>R</i>                     | >99                |
| <b>K</b> | 5.0 mM          | 1%                | Medium 2        | 180 | 72                           | 4                     | 82                     | 14                        | <i>R</i>                     | >99                |
|          |                 |                   |                 |     | 96                           | 1                     | 85                     | 14                        | <i>R</i>                     | >99                |
|          |                 |                   |                 |     | 120                          | 1                     | 89                     | 10                        | <i>R</i>                     | >99                |

---

[1] Addition of substrate at zero time of inoculation.

[2] Relative amount of phenyl methyl sulfide, phenyl methyl sulfoxide and phenyl methyl sulfone in reaction samples\_ calculated by GC-MS.

[3] Configurations and (*ee* %) enantiomeric excess values were analyzed by chiral GC-FID.

ND – not determined

---
